# Supplementary material for: Detection of hepatocellular carcinoma in a population at risk: iodine-enhanced multidetector CT and/or gadoxetic acid-enhanced 3.0 T MRI
Source: HighWire-hosted journal article supplement (doi:10.1136/bmjopen-2021-058461), 2022-02-01
Supplement: bmjopen-2021-058461supp001_data_supplement.pdf [file bmjopen-2021-058461supp001_data_supplement.pdf]

Suppl. Table 1. Demographical and clinical conditions of patients before index tests

| Parameter                                               | Value                       |                   |
|---------------------------------------------------------|-----------------------------|-------------------|
| Numbers of patients whose data reviewed retrospectively | 815                         |                   |
| Sex                                                     | Male                        | 562(69)           |
|                                                         | Female                      | 253(31)           |
| Age (years)                                             | Minimum                     | 38                |
|                                                         | Maximum                     | 67                |
|                                                         | Mean $\pm$ SD               | 53.12 $\pm$ 11.45 |
| Nodule size (cm)                                        |                             | 1.45 $\pm$ 0.55   |
|                                                         | Alcoholism                  | 255(31)           |
| Risk factor for screening of hepatocellular carcinoma   | Liver cirrhosis             | 145(18)           |
|                                                         | Hepatitis B virus infection | 201(25)           |
|                                                         | Hepatitis C virus infection | 111(14)           |
|                                                         | Fatty liver                 | 103(12)           |
| Alpha fetoprotein (ng/mL)                               | 50.14 $\pm$ 11.42           |                   |

Categoric data are presented as frequency (percentage) and continuous data are presented as mean  $\pm$  standard deviation (SD).
